# Supplementary material
Source: PubMed Central journal article supplement (PMC5161578)

# Western blot corresponding to **Extended Data Fig. 4h**

BCL2L11 and GAPDH blotting in sorted bone marrow neutrophils

BCL2L11 blot

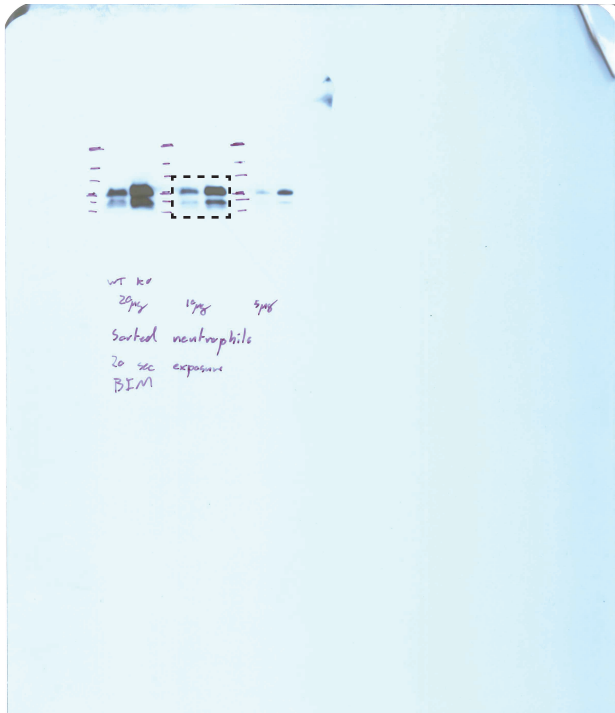

GAPDH blot

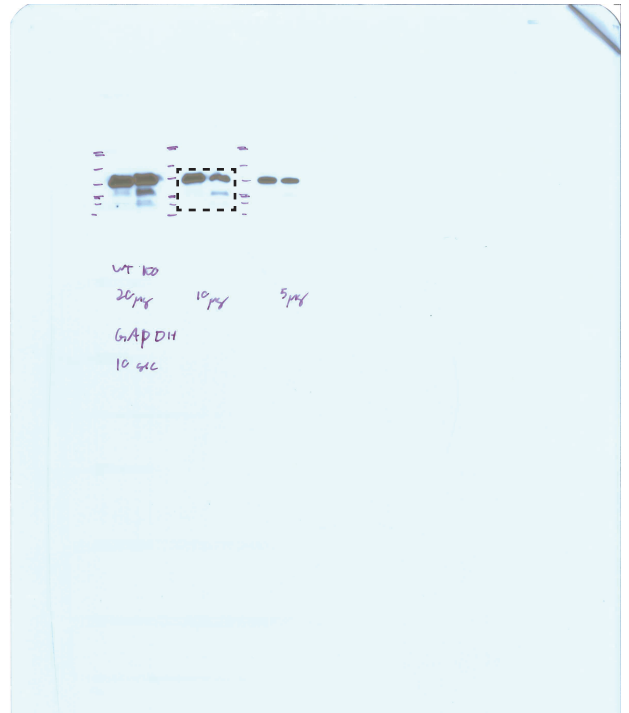

Gels corresponding to **Fig. 4d** and **Extended Data Fig. 8d**

3C control fragerments

Sample 1,2 - Control 2, 5, 1

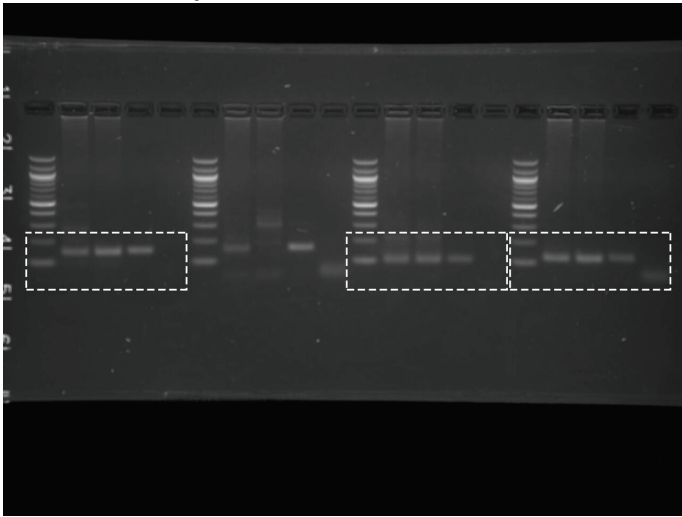

Sample 1,2 - Control 3, 4

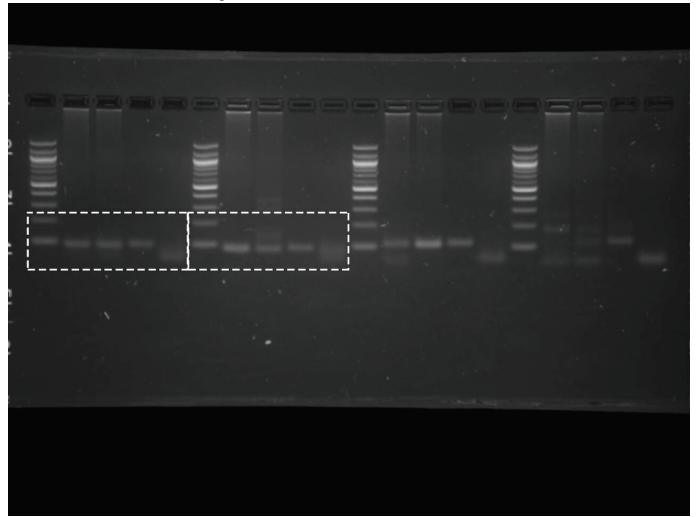

Sample 1,2 - Control 6, 7

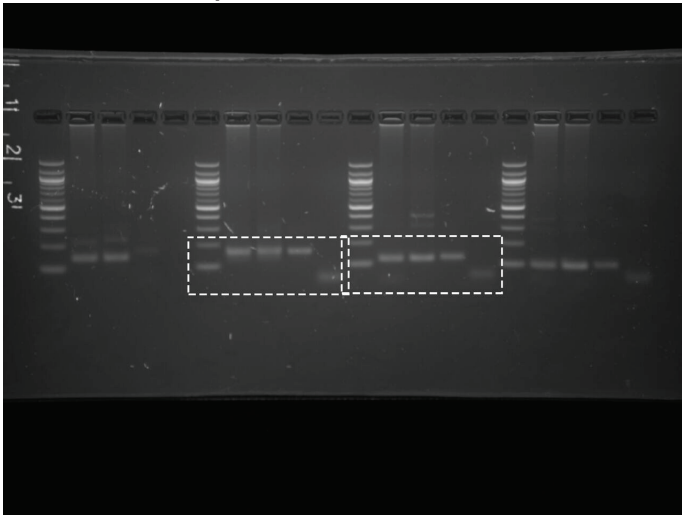

Sample 3 - Control 2, 5, 1

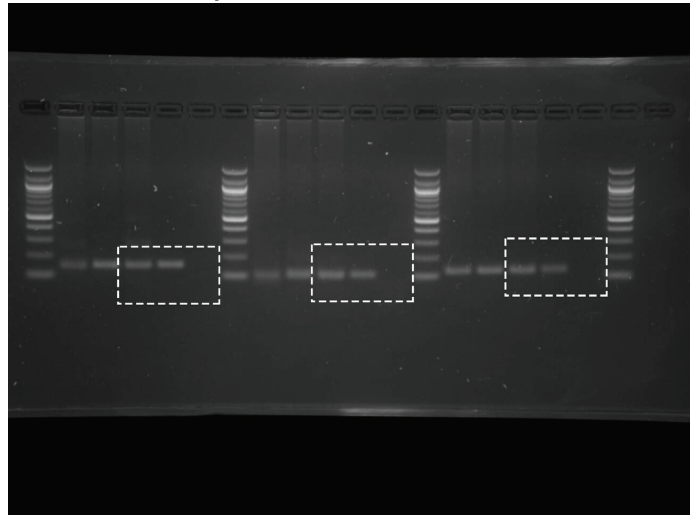

Sample 3 - Control 3, 4, 6

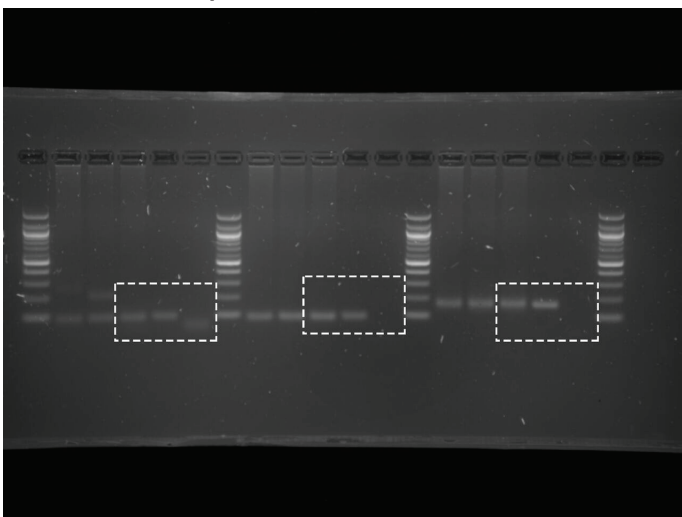

Sample 3 - Control 7

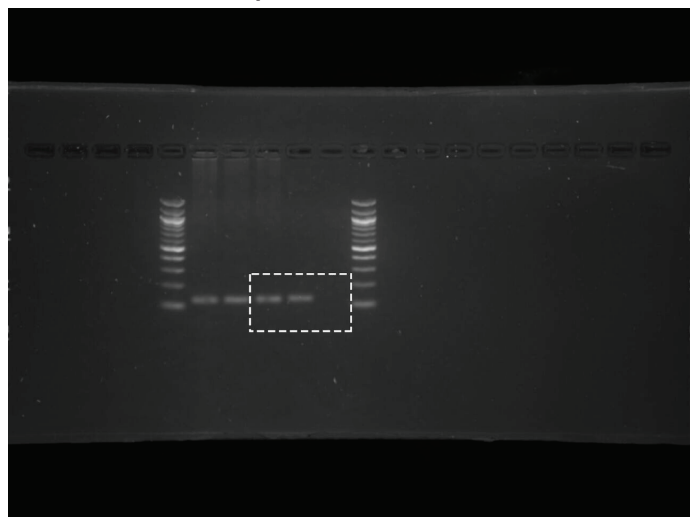

Gels corresponding to **Fig. 4d** and **Extended Data Fig. 8d**

3C test fragments

Sample 1,2 - Test 3,2,1

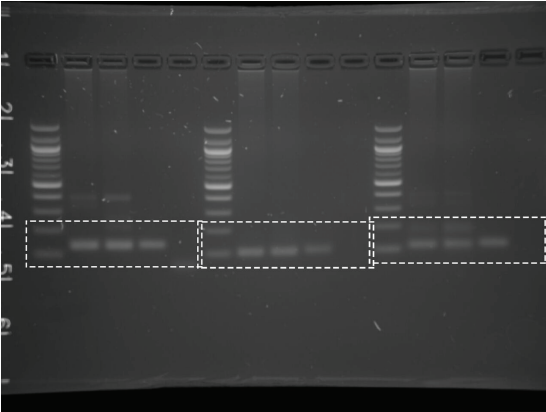

Sample 1,2 - Test 5,4

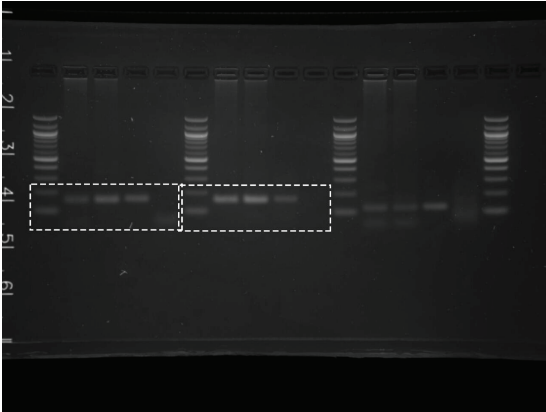

Sample 1,2 - Test 8,7,6

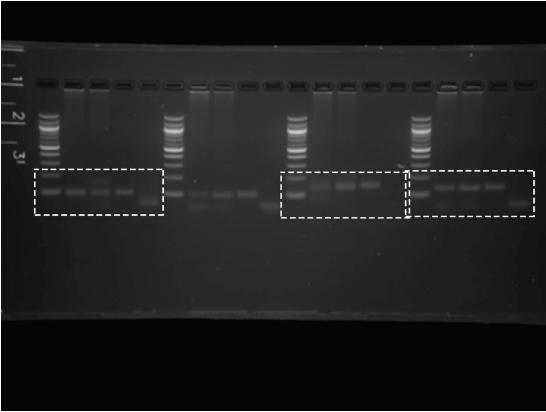

Sample 3 - Test 1

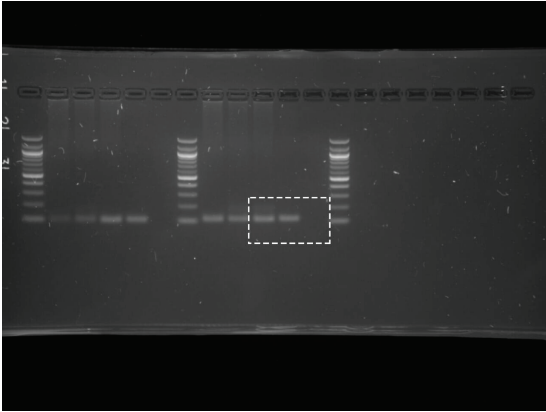

Sample 3 - Test 2

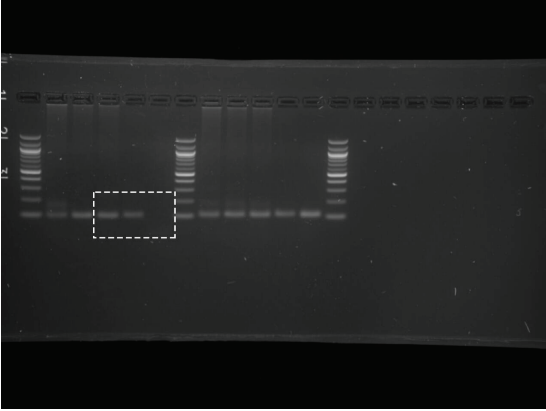

Sample 3 - Test 5,4,3

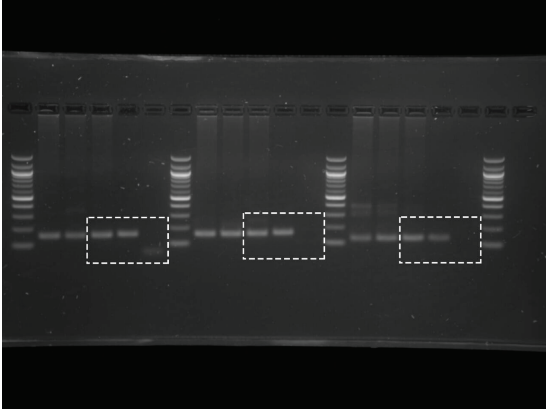

Sample 3 - Test 8,7,6

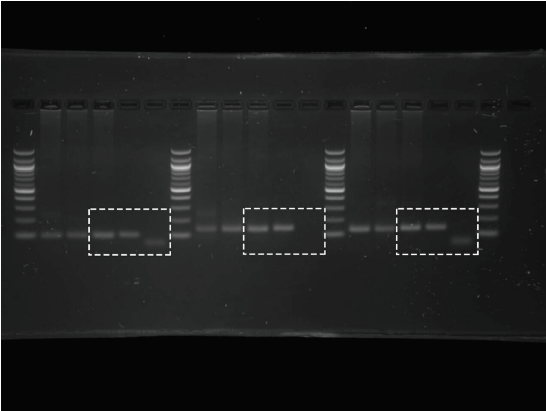

Gel corresponding to **Extended Data Fig. 6k**

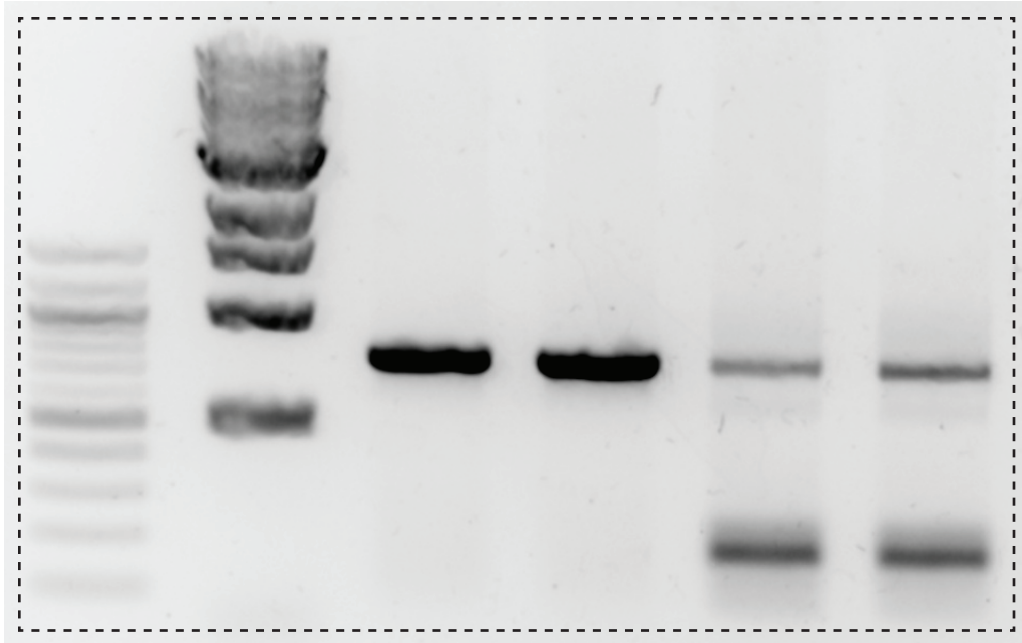

# Gels corresponding to **Extended Data Fig. 9**

Allele specific *Morrbid*- and *Bcl2l11*-deficient heterozygous mice generation genotyping

WT x *Morrbid*<sup>-/+</sup>;*Bcl2l11*<sup>-/+</sup> Cis

*Morrbid* PCR

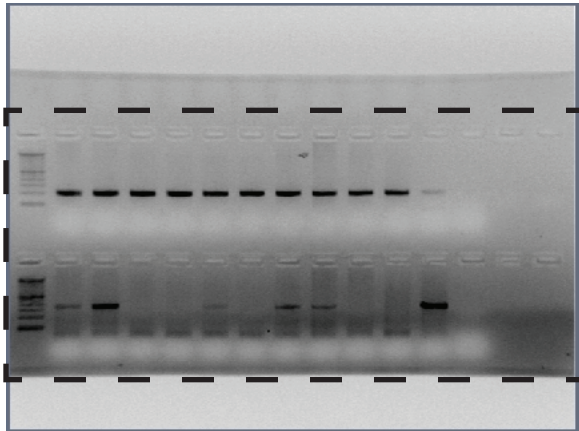

WT x *Morrbid*<sup>-/+</sup>;*Bcl2l11*<sup>+/-</sup> Trans

*Morrbid* PCR

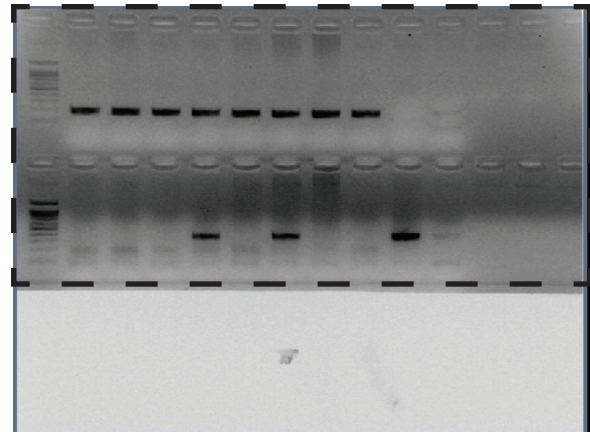

*Bcl2l11* PCR

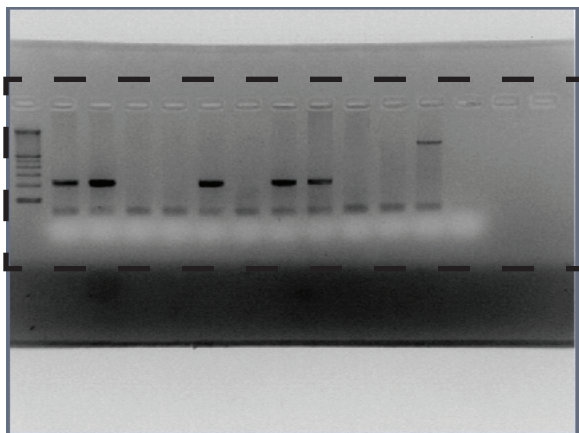

*Bcl2l11* PCR

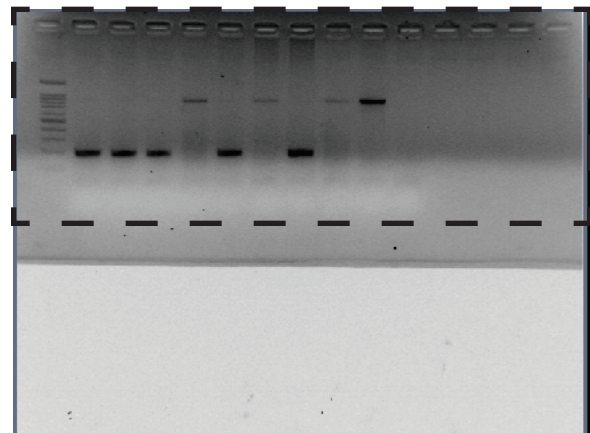

Supplement: NIHMS809297-supplement-supp_fig1.pdf [file NIHMS809297-supplement-supp_fig1.pdf]
